# Supplementary material for: DNA Microarray Wet Lab Simulation Brings Genomics into the High School Curriculum
Source: Atypon-hosted journal article supplement (doi:10.1187/cbe.06-07-0172), 2006-12-01
Supplement: supplemental_material_5.pdf [file supplemental_material_5.pdf]

## **Appendix 5. Additional Microarray Resources.**

### *Animations*

DNA Microarray Methodology Animation created by Dr. A. Malcolm Campbell at Davidson College, (<http://www.bio.davidson.edu/courses/genomics/chip/chip.html>)

Genetic Science Learning Center animation & background information from University of Utah  
<http://gslc.genetics.utah.edu/units/pharma/phmicroarray/>

Scanning Life's Matrix: Genes, Proteins, and Small Molecules HHMI Holiday Lecture Series  
<http://www.hhmi.org/biointeractive/genomics/index.html>

### *Educational Curricula*

DNA Chips: A Genetics Lab in the Palm of Your Hand (in Modern Biology for High School Classrooms Snapshots Magazine)  
[http://science.education.nih.gov/newsnapshots/TOC\\_Chips/toc\\_chips.html](http://science.education.nih.gov/newsnapshots/TOC_Chips/toc_chips.html)

Interactive Class Exercise on DNA Microarrays and Medicine, designed by Graham Walker and Mandana Sassanfar, Department of Biology, MIT  
[www.cfkeep.org/uploads/idna\\_microarray\\_exercise.pdf](http://www.cfkeep.org/uploads/idna_microarray_exercise.pdf)

Science NetLinks (from AAAS) – DNA Chips  
<http://www.sciencenetlinks.com/lessons.cfm?DocID=339>

“Computers and Biotechnology” in The Biotechnology Institute magazine, Your World:

Biotechnology & You

[http://www.biotechinstitute.org/resources/your\\_world\\_magazine.html](http://www.biotechinstitute.org/resources/your_world_magazine.html)

Affymetrix educational materials (background information, images, and curricular ideas, including ethical debates on the use of microarray data)

<http://www.affymetrix.com/corporate/outreach/educator.affx>

### ***Background Information***

Stanford Microarray Database <http://genome-www5.stanford.edu/MicroArray/SMD/>

Genome Consortium for Active Teaching (GCAT).

<http://www.bio.davidson.edu/Biology/GCAT/GCAT.html>

Anatomy of a Comparative Gene Expression Study by Jeremy Buhler

<http://www.cs.wustl.edu/~jbuhler//research/array/>

National Human Genetics Research Institute

<http://research.nhgri.nih.gov/microarray/>

Microarrays Fact Sheet

<http://www.ncbi.nlm.nih.gov/About/primer/microarrays.html>

DNA Microarray (Gene Chips) – Monitoring the Genome on a Chip

<http://www.gene-chips.com/>

National Institute of Environmental and Health Sciences (NIEHS)

<http://dir.niehs.nih.gov/microarray/backgrnd.htm>

Microarray Projects at TIGR

<http://www.tigr.org/microarray/>
